# Supplementary material for: Belowground fungal community diversity and composition associated with Norway spruce along an altitudinal gradient
Source: PLoS One. 2018 Dec 5;13(12):e0208493. doi: 10.1371/journal.pone.0208493 (PMC6281267; doi:10.1371/journal.pone.0208493)
Supplement: S1 Table — Identifiers are given according to plant host age, altitude and replicate number (see S1 Fig). For each sample, the number of sequenced paired-end reads and the number of species and orders detected (against the NCBI ITS RefSeq) are presented. Additionally, the number and percentage of overlapping species between two samples of the same plot (old and young trees) are included (and denoted as ‘overlap to neighbour’). Note that the number of raw sequences is given as the number of read pairs, while the number of clipped and merged reads is given as single reads. (XLSX) [file pone.0208493.s001.xlsx]

## Sheet: Sheet1
Sample	No.	ID	SRA accession	#seqs raw (x2, paired end reads)	# seqs clip&merge (single reads)	# seqs uchime derep	assigned orders	overlap to neighbour	overlap to neighbor [perc]	D0 – species richness	D0.25	D0.5	D1	D2	D4	D8	D16	D32	D64	Dinf
I15D022b01	1	O-I-1	SAMN07709188	1078260	1195887	777621	49	257	54.7974	469	180.277	70.1856	21.6748	10.4217	7.12752	5.95568	5.47555	5.22834	5.09677	4.96875
I15D022b02	2	O-I-2	SAMN07709189	798374	1064640	599098	42	152	62.8099	242	88.7519	39.5675	18.012	10.5738	7.34429	5.89081	5.25512	4.98145	4.85609	4.73765
I15D022b03	3	O-I-3	SAMN07709190	678079	906247	600595	41	255	57.1749	446	212.994	110.171	46.7654	22.0265	13.7011	10.8264	9.68065	9.17633	8.92089	8.63258
I15D022b04	4	O-II-1	SAMN07709191	692130	914886	533214	45	261	67.4419	387	149.707	58.1531	18.377	10.0728	7.94323	7.1407	6.7154	6.41754	6.23899	6.06316
I15D022b05	5	O-II-2	SAMN07709192	767203	1040430	611906	39	177	49.4413	358	140.361	59.7608	23.8993	14.6674	11.2806	9.26018	8.10165	7.57524	7.33564	7.11075
I15D022b06	6	O-II-3	SAMN07709193	907405	1204903	779693	48	127	46.3504	274	120.147	55.6139	21.183	10.5581	6.67669	5.2093	4.66829	4.44194	4.33804	4.23971
I15D022b07	7	O-III-1	SAMN07709194	698925	808282	433910	62	291	57.5099	506	175.545	66.1321	22.7693	12.6222	9.49955	8.18401	7.51565	7.12266	6.90893	6.70343
I15D022b08	8	O-III-2	SAMN07709195	876577	1008271	556727	67	192	39.834	482	199.091	80.8157	22.6551	9.94142	7.0433	5.84708	5.25077	4.97865	4.8534	4.73508
I15D022b09	9	O-III-3	SAMN07709196	638127	845451	472575	63	212	42.7419	496	194.678	80.1771	28.9442	16.2311	12.614	11.1628	10.3016	9.73664	9.41288	9.08956
I15D022b10	10	Y-I-1	SAMN07709197	679567	921083	597512	59	257	54.4492	472	183.99	72.2141	23.4263	11.6662	8.1036	6.7883	6.21864	5.93243	5.77658	5.62069
I15D022b11	11	Y-I-2	SAMN07709198	756917	1006735	633482	49	152	34.0807	446	184.823	82.8029	32.4865	16.2794	9.91011	7.58862	6.67572	6.28038	6.09985	5.92992
I15D022b12	12	Y-I-3	SAMN07709199	603625	790564	535508	46	255	59.8592	426	167.438	65.653	19.8385	8.72391	5.46135	4.37289	3.96553	3.79316	3.71373	3.63838
I15D022b13	13	Y-II-1	SAMN07709200	716531	996299	583906	52	261	64.2857	406	171.544	71.7837	18.2665	5.49222	3.33885	2.81281	2.62541	2.54492	2.50747	2.47171
I15D022b14	14	Y-II-2	SAMN07709201	698967	955271	494246	30	177	66.2921	267	122.31	61.8275	26.1895	13.2568	8.76393	6.99222	6.21144	5.85893	5.69681	5.54402
I15D022b15	15	Y-II-3	SAMN07709202	778545	1042106	527971	37	127	76.0479	167	63.3187	26.9767	11.3359	7.17045	5.7207	5.0732	4.69969	4.48519	4.37988	4.27996
I15D022b16	16	Y-III-1	SAMN07709203	765324	923620	508350	59	291	69.7842	417	160.42	67.8246	25.3827	12.8168	8.448	6.79298	6.08078	5.7446	5.58746	5.43925
I15D022b17	17	Y-III-2	SAMN07709204	836426	960230	572507	41	192	81.7021	235	69.4777	18.5469	3.33863	1.63442	1.39404	1.32943	1.30444	1.2933	1.28803	1.28295
I15D022b18	18	Y-III-3	SAMN07709205	698546	932691	418526	49	212	74.6479	284	88.0299	32.4067	13.8298	8.90979	6.66514	5.52539	4.97493	4.72527	4.61022	4.50143
average				759418	973200	568742	48.7778	213.778	58.8473	376.667
min				603625	790564	418526	30	127	34.0807	167
max				1078260	1204903	779693	67	291	81.7021	506
